# Supplementary material for: Intense Habitat-Specific Fisheries-Induced Selection at the Molecular Pan I Locus Predicts Imminent Collapse of a Major Cod Fishery
Source: PLOS journal article supplement (doi:10.1371/journal.pone.0005529), 2009-05-26
Supplement: S10 (10.1371/journal.pone.0005529.s010) [file journal.pone.0005529.s010]

**Table S2. Genotypic frequencies pooled pre and post selection, weights and fitnesses.**

| Age      | <i>AA</i> |      |      | <i>AB</i> |      |      | <i>BB</i> |      |      | Sum |
|----------|-----------|------|------|-----------|------|------|-----------|------|------|-----|
|          | obs       | rel  | SE   | obs       | rel  | SE   | obs       | rel  | SE   |     |
| 3–4      | 81        | 0.57 | 0.04 | 46        | 0.33 | 0.04 | 14        | 0.10 | 0.00 | 141 |
| 8–13     | 123       | 0.24 | 0.02 | 197       | 0.39 | 0.02 | 191       | 0.37 | 0.02 | 511 |
| <i>U</i> |           | 0.42 | 0.05 |           | 1.18 | 0.16 |           | 3.76 | 0.98 |     |
| <i>W</i> |           | 0.11 | 0.28 |           | 0.31 | 0.29 |           | 1.00 | 0.37 |     |

Genotypic frequencies pooled among 3–4 (“pre-selection”) and 8–13 years old (“post-selection”), weights, *U*, and fitness, *W*, relative to the most fit *BB* genotype. Respective standard errors are based on variance of ratios.
