# Supplementary material for: Intense Habitat-Specific Fisheries-Induced Selection at the Molecular Pan I Locus Predicts Imminent Collapse of a Major Cod Fishery
Source: PLOS journal article supplement (doi:10.1371/journal.pone.0005529), 2009-05-26
Supplement: S11 (10.1371/journal.pone.0005529.s011) [file journal.pone.0005529.s011]

**Table S3. Fitness based on weights as ratios of median genotypic frequency changes between years within year class.**

| Age                     | Weights, $U$ |          |          |
|-------------------------|--------------|----------|----------|
|                         | $U_{AA}$     | $U_{AB}$ | $U_{BB}$ |
| 4                       | 1.164        | 0.752    | 1.214    |
| 5                       | 0.829        | 1.004    | 2.061    |
| 6                       | 0.714        | 0.946    | 2.920    |
| 7                       | 0.731        | 1.014    | 1.288    |
| 8                       | 0.691        | 0.853    | 1.425    |
| 9                       | 0.932        | 0.995    | 1.055    |
| 10                      | 0.750        | 0.986    | 1.164    |
| 11                      | 0.864        | 0.901    | 0.875    |
| 12                      | 0.505        | 0.812    | 3.940    |
| 13                      | 1.167        | 1.061    | 0.875    |
| $\Pi_{j=5}^{11} U_{ij}$ | 0.181        | 0.726    | 11.873   |
| $W_i$                   | 0.015        | 0.061    | 1.0      |

Products of weights,  $\Pi_{j=5}^{11} U_{ij}$ , for ages 5–11. Fitness of genotypes,  $W_i$ , relative to the most fit  $BB$  genotype.
